# Supplementary material for: Translesion DNA synthesis-assisted non-homologous end-joining of complex double-strand breaks prevents loss of DNA sequences in mammalian cells
Source: PubMed Central journal article supplement — Nucleic Acids Res. 2009 Sep 17;37(20):6737–45. doi: 10.1093/nar/gkp703 (PMC2777433; doi:10.1093/nar/gkp703), 2009-09-17
Supplement: gkp703_1.pdf [file gkp703_1.pdf]

**Supplementary Data NAR-00675 D-2009 R2****Covo et al, 2009. Translesion DNA Synthesis-Assisted Non-Homologous End-Joining of Complex Double-Strand Breaks Prevents Loss of DNA Sequences in Mammalian Cells****Table S1.** Repair of complex DSB (Substrate LP41) relative to simple DSB (Substrate LP40) in hamster cells defective in NHEJ genes

| Cell type/vector                         | Number of colonies<br>(DNA amount <sup>b</sup> ) |                 | Relative Repair <sup>a</sup><br>% |
|------------------------------------------|--------------------------------------------------|-----------------|-----------------------------------|
|                                          | Kan <sup>R</sup>                                 | Cm <sup>R</sup> |                                   |
| CHO K1 (wild-type)                       |                                                  |                 | 56.1±7.0                          |
| LP41                                     | 203 (350)                                        | 253 (24)        |                                   |
| LP40                                     | 393 (350)                                        | 260 (24)        |                                   |
| LP41                                     | 228 (350)                                        | 229 (24)        |                                   |
| LP40                                     | 194 (350)                                        | 99 (24)         |                                   |
| LP41                                     | 37 (350)                                         | 101 (24)        |                                   |
| LP40                                     | 87 (350)                                         | 158 (24)        |                                   |
| LP41                                     | 220 (350)                                        | 588 (24)        |                                   |
| LP40                                     | 374 (350)                                        | 634 (24)        |                                   |
| LP41                                     | 204 (350)                                        | 252 (24)        |                                   |
| LP40                                     | 344 (350)                                        | 221 (24)        |                                   |
| LP41                                     | 99 (350)                                         | 280 (24)        |                                   |
| LP40                                     | 433 (350)                                        | 632 (24)        |                                   |
| CHO XR1 ( <i>XrccIV</i> <sup>-/-</sup> ) |                                                  |                 | NA                                |
| LP41                                     | 6 (350)                                          | 636 (24)        |                                   |
| LP40                                     | 2 (350)                                          | 364 (24)        |                                   |
| LP41                                     | 0 (350)                                          | 76 (24)         |                                   |
| LP40                                     | 1 (350)                                          | 96 (24)         |                                   |
| LP41                                     | 6 (350)                                          | 233 (24)        |                                   |
| LP40                                     | 1 (350)                                          | 364 (24)        |                                   |
| CHO XRS5 ( <i>Ku80</i> <sup>-/-</sup> )  |                                                  |                 | 51.0±4.9                          |
| LP41                                     | 106 (200)                                        | 1228 (24)       |                                   |
| LP40                                     | 203 (200)                                        | 1122 (24)       |                                   |
| LP41                                     | 18 (200)                                         | 348 (24)        |                                   |
| LP40                                     | 35 (200)                                         | 330 (24)        |                                   |
| LP41                                     | 58 (200)                                         | 572 (24)        |                                   |
| LP40                                     | 121 (200)                                        | 676 (24)        |                                   |

NHEJ assays were performed with the indicated cell lines as described in the legend to Table 1 and under Materials and Methods. The relative repair represents the average obtained from the experiments shown for each cell type. <sup>a</sup>Relative repair of cDSB relative to sDSB.

Supplementary Data NAR-00675 D-2009 R2

Covo et al, 2009. Translesion DNA Synthesis-Assisted Non-Homologous End-Joining of Complex Double-Strand Breaks Prevents Loss of DNA Sequences in Mammalian Cells

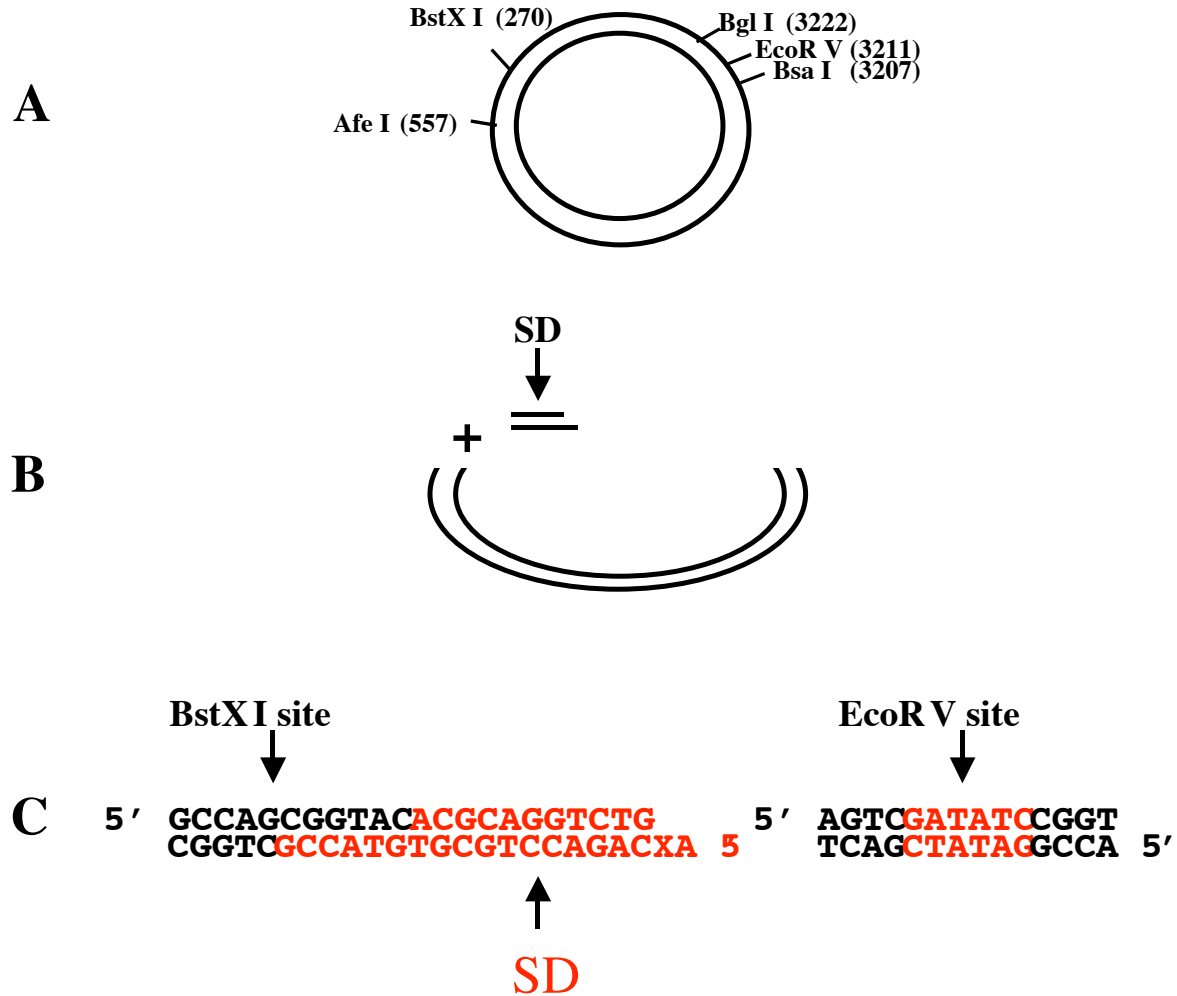

**Figure S1. Construction of linear plasmids LP40 and LP41.** (A) Map of parental plasmid pSKSL annotated with relevant restriction sites. The EcoRV site was cloned into plasmid pSKSL between the BglI and BsaI sites. In order to obtain the linear vector fragment needed for the construction of LP41 and LP40 the plasmid was digested with BstXI and BglI. (B) Ligation of the short duplex (SD) oligonucleotide to the BstXI site (“left” side of the vector). (C) The cDSB generated after ligation of the SD (in red) to the vector. X marks the abasic site modification. The “right” side of the DSB was created by digestion with EcoRV.

**Supplementary Data NAR-00675 D-2009 R2**

**Covo et al, 2009. Translesion DNA Synthesis-Assisted Non-Homologous End-Joining of Complex Double-Strand Breaks Prevents Loss of DNA Sequences in Mammalian Cells**

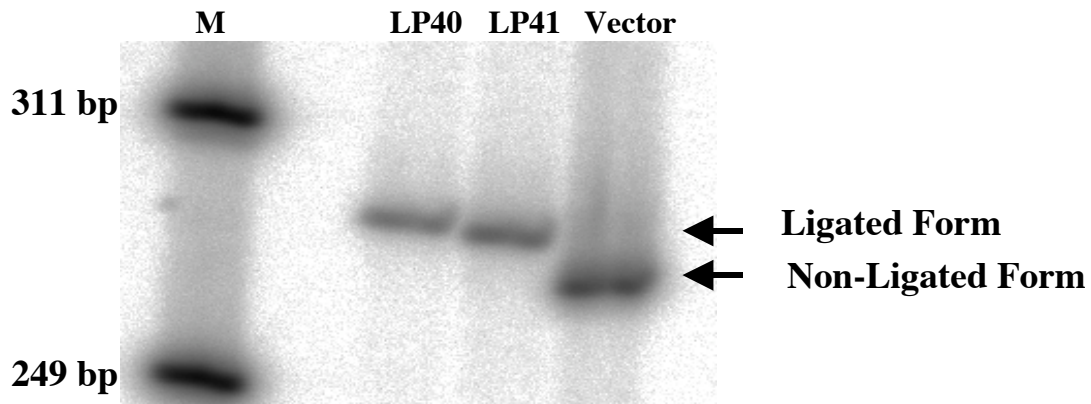

**Figure S2. Confirmation of ligation efficiency of LP41/40.** Samples from the ligation mixture and a control non-ligated vector were digested with AfeI (see Fig. 1S), radiolabeled at their 5' using polynucleotide kinase and  $\text{ATP}\gamma^{32}\text{P}$ , and fractionated by a native 6% PAGE. Arrows indicate ligated and non-ligated forms, M, DNA size marker.
